# Supplementary material for: Analytical and Clinical Performance of the NeuMoDx™ Platform for Cytomegalovirus and Epstein–Barr Virus Viral Load Testing
Source: MDPI journal article supplement (doi:10.3390/v16050671), 2024-04-25
Supplement: s1 [file s1]

---

## Supplementary material

### *NeuMoDx CMV and EBV Quant Assays*

Ethylenediaminetetraacetic acid (EDTA)-treated human plasma samples were tested on the NeuMoDx System by employing automated DNA extraction and real-time polymerase chain reaction amplification, result processing and interpretation. The NeuMoDx CMV Quant Assay and the NeuMoDx EBV Quant Assay on the NeuMoDx 96 Molecular System utilise the NeuMoDx CMV/EBV Quant Test Strips, NeuMoDx CMV/EBV Calibrators, NeuMoDx CMV/EBV External Controls, NeuMoDx Lysis Buffer 1 (for cytomegalovirus [CMV]) and 5 (for Epstein-Barr virus [EBV]) and NeuMoDx general use reagents [10,11]. The NeuMoDx CMV Quant Assay allows the amplification of the *UL54* and *UL71* genes in the CMV genome, and the NeuMoDx EBV Quant Assay targets *BALF5* and *BXFL1* in the EBV genome [23]. The minimum sample volume for CMV and EBV, respectively, was 550 µL and 250 µL of EDTA-treated human plasma (plus excess volume requirements to make it up to 1.2 mL).

### *artus CMV and EBV QS-RGQ Kits*

Purification of DNA was performed from 1.2 mL (including excess volume) of EDTA-treated human plasma using the QIAasymphony DSP Virus/Pathogen Midi Kit on the QIAasymphony SP instrument. The eluates from the sample preparation procedure (initial volume 90 µL; preselected protocol volume 60 µL) containing purified DNA were transferred to the QIAasymphony AS module using the 'integrated run' setup. The assays were transferred to the Rotor-Gene Q real-time polymerase chain reaction (PCR) instrument for PCR.

The CMV RG Master Mix and the EBV RG Master Mix contained the reagents and enzymes for the specific amplification of a 105 bp region of the *MIE* gene in the CMV genome and a 97 bp region of the *EBNA-1* gene in the EBV genome, respectively, allowing the direct detection of the specific amplicons [20, 26]. Both assays contained a second heterologous amplification system to identify possible PCR inhibition. Quantitation standards (CMV QS 1–4 and EBV RG QS 1–4) were included per PCR run to generate a standard curve and allow determination of DNA VL in copies/mL; a negative control (PCR grade water) was also included per PCR run. The results in copies/mL were converted to IU/mL prior to data analysis.

### *Assay calculations*

The quantitation standards are defined as copies/µL in the eluate. The following equation was applied to convert the DNA values determined using the standard curve into copies/mL of sample material.

$$\frac{\text{Result (copies/mL)}}{\text{Sample volume (1 mL)}} = \frac{\text{Result (copies/}\mu\text{L)}}{\text{initial elution volume (90 }\mu\text{L)}}$$

To convert copies/mL to IU/mL prior to data analysis, the conversion factor for the artus CMV QS-RGQ Kits is as follows: 1 copy/mL corresponds to 1.64 IU/mL for detection of CMV DNA and to 0.142 IU/mL for detection of EBV DNA derived from EDTA-treated human plasma on the Rotor-Gene Q.

**Table S1.** Analytical sensitivity of the NeuMoDx CMV Quant Assay determined using the Qnostics CMV Analytical Q Panel 02 (CMVAQP02-B).

| Sample code  | Panel target concentration |              | NeuMoDx CMV Quant Assay results |              | Difference in concentration <sup>a</sup> |
|--------------|----------------------------|--------------|---------------------------------|--------------|------------------------------------------|
|              | log <sub>10</sub> IU/mL    | IU/mL        | log <sub>10</sub> IU/mL         | IU/mL        |                                          |
| CMVAQP02-S01 | 5.0                        | 100,000      | 4.63                            | 43,000       | −0.37                                    |
| CMVAQP02-S02 | 4.5                        | 30,000       | 4.11                            | 13,000       | −0.39                                    |
| CMVAQP02-S03 | 4.0                        | 10,000       | 3.77                            | 5,900        | −0.23                                    |
| CMVAQP02-S04 | 3.5                        | 3,000        | 3.26                            | 1,800        | −0.24                                    |
| CMVAQP02-S05 | 3.0                        | 1,000        | 2.64                            | 440          | −0.36                                    |
| CMVAQP02-S06 | 2.5                        | 300          | 2.04                            | 110          | −0.46                                    |
| CMVAQP02-S07 | 2.0                        | 100          | 1.98                            | 96           | −0.02                                    |
| CMVAQP02-S08 | 1.5                        | 30           | 1.30                            | 20           | −0.20                                    |
| CMVAQP02-S09 | Not detected               | Not detected | Not detected                    | Not detected | 0                                        |

<sup>a</sup> NeuMoDx CMV Quant Assay (log<sub>10</sub> IU/mL) minus panel target concentration (log<sub>10</sub> IU/mL). CMV, cytomegalovirus; IU, international units.

**Table S2.** Summary of samples used to assess clinical performance of the NeuMoDx CMV and EBV Quant Assays.

| Tested for CMV and EBV DNA             |                             |
|----------------------------------------|-----------------------------|
| Samples collected (number of patients) | 89 (12)                     |
| Samples excluded                       | 14 <sup>a</sup>             |
| Samples with valid results             | 75                          |
| Sample type                            | Plasma (frozen)             |
| Sample collection period               | 2018–2020                   |
| Reference method                       | artus CMV/EBV QS-RGQ kit    |
| Test method                            | NeuMoDx CMV/EBV Quant Assay |

<sup>a</sup> Excluded due to insufficient sample, n = 11; excluded due to indeterminate results with both NeuMoDx CMV and EBV Quant Assays, n = 3. CMV, cytomegalovirus; EBV, Epstein-Barr virus.

**Table S3.** Comparison of the CMV DNA levels attained using the artus CMV QS-RGQ Kit and the NeuMoDx CMV Quant Assay.

| Sample No.                                           | artus CMV QS-RGQ Kit |                      | NeuMoDx CMV Quant Assay |                      |
|------------------------------------------------------|----------------------|----------------------|-------------------------|----------------------|
|                                                      | Result               | Concentration, IU/mL | Result                  | Concentration, IU/mL |
| <i>Detected above the LoD of both assays, n = 33</i> |                      |                      |                         |                      |
| 2                                                    | Detected             | 195.2                | Detected                | 660                  |
| 7                                                    | Detected             | 96.8                 | Detected                | 79                   |
| 8                                                    | Detected             | 161,471.1            | Detected                | 95,000               |
| 9                                                    | Detected             | 7,683.4              | Detected                | 11,000               |
| 10                                                   | Detected             | 149.2                | Detected                | 270                  |
| 14                                                   | Detected             | 5,061.0              | Detected                | 2,800                |
| 16                                                   | Detected             | 2,171.4              | Detected                | 130                  |
| 17                                                   | Detected             | 8,118.0              | Detected                | 3,500                |
| 18                                                   | Detected             | 2,860.2              | Detected                | 2,000                |
| 22                                                   | Detected             | 329.6                | Detected                | 180                  |
| 23                                                   | Detected             | 887.2                | Detected                | 1,100                |
| 25                                                   | Detected             | 27,809.5             | Detected                | 15,000               |
| 26                                                   | Detected             | 3,166.8              | Detected                | 3,000                |
| 29                                                   | Detected             | 425,306.1            | Detected                | 21,000               |
| 30                                                   | Detected             | 165,433.4            | Detected                | 13,000               |
| 31                                                   | Detected             | 55,356.6             | Detected                | 71,000               |
| 33                                                   | Detected             | 57,173.7             | Detected                | 32,000               |
| 34                                                   | Detected             | 36,265.3             | Detected                | 17,000               |
| 35                                                   | Detected             | 2,932.3              | Detected                | 2,800                |
| 36                                                   | Detected             | 93.5                 | Detected                | 100                  |
| 37                                                   | Detected             | 236.2                | Detected                | 87                   |
| 38                                                   | Detected             | 7,304.6              | Detected                | 4,500                |
| 39                                                   | Detected             | 39,164.8             | Detected                | 38,000               |
| 40                                                   | Detected             | 8,477.2              | Detected                | 17,000               |
| 41                                                   | Detected             | 201.7                | Detected                | 740                  |
| 45                                                   | Detected             | 85.3                 | Detected                | 54                   |
| 66                                                   | Detected             | 216,680.1            | Detected                | 180,000              |

|                                                                                |              |          |              |        |
|--------------------------------------------------------------------------------|--------------|----------|--------------|--------|
| 68                                                                             | Detected     | 13,080.6 | Detected     | 23,000 |
| 69                                                                             | Detected     | 434.6    | Detected     | 930    |
| 70                                                                             | Detected     | 70.5     | Detected     | 170    |
| 74                                                                             | Detected     | 123.0    | Detected     | 250    |
| 87                                                                             | Detected     | 1,600.6  | Detected     | 480    |
| 89                                                                             | Detected     | 172.2    | Detected     | 51     |
| <i>Detected below the artus LoD but detected above the NeuMoDx LoD, n = 15</i> |              |          |              |        |
| 3                                                                              | Detected     | <69.7    | Detected     | 35     |
| 4                                                                              | Detected     | <69.7    | Detected     | 51     |
| 5                                                                              | Detected     | <69.7    | Detected     | 22     |
| 11                                                                             | Detected     | <69.7    | Detected     | 130    |
| 12                                                                             | Detected     | <69.7    | Detected     | 98     |
| 19                                                                             | Detected     | <69.7    | Detected     | 110    |
| 20                                                                             | Detected     | <69.7    | Detected     | 190    |
| 24                                                                             | Detected     | <69.7    | Detected     | 58     |
| 27                                                                             | Detected     | <69.7    | Detected     | 46     |
| 46                                                                             | Detected     | <69.7    | Detected     | 35     |
| 71                                                                             | Detected     | <69.7    | Detected     | 60     |
| 72                                                                             | Detected     | <69.7    | Detected     | 40     |
| 75                                                                             | Detected     | <69.7    | Detected     | 180    |
| 77                                                                             | Detected     | <69.7    | Detected     | 72     |
| 82                                                                             | Detected     | <69.7    | Detected     | 32     |
| <i>Not detected by artus but detected above the NeuMoDx LoD, n = 5</i>         |              |          |              |        |
| 6                                                                              | Not detected | N/A      | Detected     | 59     |
| 21                                                                             | Not detected | N/A      | Detected     | 25     |
| 42                                                                             | Not detected | N/A      | Detected     | 28     |
| 73                                                                             | Not detected | N/A      | Detected     | 50     |
| 76                                                                             | Not detected | N/A      | Detected     | 76     |
| <i>Detected below the artus LoD and detected below the NeuMoDx LoD, n = 1</i>  |              |          |              |        |
| 81                                                                             | Detected     | <69.7    | Detected     | <20    |
| <i>Not detected by artus but detected below the NeuMoDx LoD, n = 1</i>         |              |          |              |        |
| 53                                                                             | Not detected | N/A      | Detected     | <20    |
| <i>Detected below the artus LoD but not detected by NeuMoDx, n = 6</i>         |              |          |              |        |
| 44                                                                             | Detected     | <69.7    | Not detected | N/A    |
| 51                                                                             | Detected     | <69.7    | Not detected | N/A    |
| 52                                                                             | Detected     | <69.7    | Not detected | N/A    |
| 80                                                                             | Detected     | <69.7    | Not detected | N/A    |
| 83                                                                             | Detected     | <69.7    | Not detected | N/A    |
| 84                                                                             | Detected     | <69.7    | Not detected | N/A    |
| <i>Not detected by artus and not detected by NeuMoDx, n = 14</i>               |              |          |              |        |
| 32                                                                             | Not detected | N/A      | Not detected | N/A    |
| 43                                                                             | Not detected | N/A      | Not detected | N/A    |
| 49                                                                             | Not detected | N/A      | Not detected | N/A    |
| 50                                                                             | Not detected | N/A      | Not detected | N/A    |
| 54                                                                             | Not detected | N/A      | Not detected | N/A    |
| 55                                                                             | Not detected | N/A      | Not detected | N/A    |
| 56                                                                             | Not detected | N/A      | Not detected | N/A    |
| 57                                                                             | Not detected | N/A      | Not detected | N/A    |
| 58                                                                             | Not detected | N/A      | Not detected | N/A    |
| 60                                                                             | Not detected | N/A      | Not detected | N/A    |
| 61                                                                             | Not detected | N/A      | Not detected | N/A    |
| 62                                                                             | Not detected | N/A      | Not detected | N/A    |
| 64                                                                             | Not detected | N/A      | Not detected | N/A    |
| 65                                                                             | Not detected | N/A      | Not detected | N/A    |

CMV, cytomegalovirus; IU, international units; LoD, limit of detection; N/A, not applicable.

**Table S4.** Analytical sensitivity of the NeuMoDx EBV Quant Assay determined using the Qnostics EBV Analytical Q Panel 03 (EBVAQP03-B).

| Sample code  | Panel target concentration |         | NeuMoDx EBV Quant Assay results |         | Difference in concentration <sup>a</sup> |
|--------------|----------------------------|---------|---------------------------------|---------|------------------------------------------|
|              | log <sub>10</sub> IU/mL    | IU/mL   | log <sub>10</sub> IU/mL         | IU/mL   |                                          |
| EBVAQP03-S01 | 5.9                        | 800,000 | 6                               | 950,000 | 0.1                                      |
| EBVAQP03-S02 | 5.6                        | 400,000 | 5.7                             | 520,000 | 0.1                                      |

|              |              |              |              |              |      |
|--------------|--------------|--------------|--------------|--------------|------|
| EBVAQP03-S03 | 4.9          | 80,000       | 5            | 91,000       | 0.1  |
| EBVAQP03-S04 | 4.6          | 40,000       | 4.7          | 49,000       | 0.1  |
| EBVAQP03-S05 | 3.9          | 8,000        | 4.1          | 12,000       | 0.2  |
| EBVAQP03-S06 | 3.6          | 4,000        | 3.9          | 7,900        | 0.3  |
| EBVAQP03-S07 | 2.9          | 800          | 3.3          | 1,900        | 0.4  |
| EBVAQP03-S08 | 2.6          | 400          | 2.7          | 450          | 0.1  |
| EBVAQP03-S09 | 1.9          | 80           | <2.3         | <200         | ≥0.4 |
| EBVAQP03-S10 | Not detected | Not detected | Not detected | Not detected | 0    |

<sup>a</sup> NeuMoDx EBV Quant Assay ( $\log_{10}$  IU/mL) minus panel target concentration ( $\log_{10}$  IU/mL). EBV, Epstein-Barr virus; IU, international units.

**Table S5.** Comparison of the EBV DNA levels attained using the NeuMoDx EBV Quant Assay and the artus EBV QS-RGQ Kit.

| Sample No.                                                                    | artus EBV QS-RGQ Kit |                      | NeuMoDx EBV Quant Assay |                      |
|-------------------------------------------------------------------------------|----------------------|----------------------|-------------------------|----------------------|
|                                                                               | Result               | Concentration, IU/mL | Result                  | Concentration, IU/mL |
| <i>Detected within the quantification limits of both assays, n = 16</i>       |                      |                      |                         |                      |
| 54                                                                            | Detected             | 1,080.8              | Detected                | 2,900                |
| 55                                                                            | Detected             | 1,218.5              | Detected                | 2,100                |
| 56                                                                            | Detected             | 339.1                | Detected                | 650                  |
| 57                                                                            | Detected             | 420.2                | Detected                | 1,100                |
| 58                                                                            | Detected             | 451.7                | Detected                | 780                  |
| 60                                                                            | Detected             | 418.3                | Detected                | 380                  |
| 61                                                                            | Detected             | 155.3                | Detected                | 250                  |
| 62                                                                            | Detected             | 171.3                | Detected                | 490                  |
| 64                                                                            | Detected             | 48.3                 | Detected                | 260                  |
| 65                                                                            | Detected             | 174.8                | Detected                | 200                  |
| 68                                                                            | Detected             | 109.2                | Detected                | 360                  |
| 73                                                                            | Detected             | 211.3                | Detected                | 330                  |
| 84                                                                            | Detected             | 25.6                 | Detected                | 260                  |
| 87                                                                            | Detected             | 4,796.8              | Detected                | 56,000               |
| 88                                                                            | Detected             | 2,610.4              | Detected                | 42,000               |
| 89                                                                            | Detected             | 3,933.1              | Detected                | 54,000               |
| <i>Detected above the artus LoD but detected below the NeuMoDx LoD, n = 2</i> |                      |                      |                         |                      |
| 23                                                                            | Detected             | 39.5                 | Detected                | <200                 |
| 81                                                                            | Detected             | 33.2                 | Detected                | <200                 |
| <i>Detected below the artus LoD and detected below the NeuMoDx LoD, n = 6</i> |                      |                      |                         |                      |
| 22                                                                            | Detected             | <22.29               | Detected                | <200                 |
| 24                                                                            | Detected             | <22.29               | Detected                | <200                 |
| 69                                                                            | Detected             | <22.29               | Detected                | <200                 |
| 70                                                                            | Detected             | <22.29               | Detected                | <200                 |
| 72                                                                            | Detected             | <22.29               | Detected                | <200                 |
| 80                                                                            | Detected             | <22.29               | Detected                | <200                 |
| <i>Not detected by artus but detected below the NeuMoDx LoD, n = 1</i>        |                      |                      |                         |                      |
| 77                                                                            | Not detected         | 0.0                  | Detected                | <200                 |
| <i>Detected below the artus LoD but not detected by NeuMoDx, n = 12</i>       |                      |                      |                         |                      |
| 9                                                                             | Detected             | <22.29               | Not detected            | N/A                  |
| 20                                                                            | Detected             | <22.29               | Not detected            | N/A                  |
| 21                                                                            | Detected             | <22.29               | Not detected            | N/A                  |
| 37                                                                            | Detected             | <22.29               | Not detected            | N/A                  |
| 38                                                                            | Detected             | <22.29               | Not detected            | N/A                  |
| 39                                                                            | Detected             | <22.29               | Not detected            | N/A                  |
| 40                                                                            | Detected             | <22.29               | Not detected            | N/A                  |
| 42                                                                            | Detected             | <22.29               | Not detected            | N/A                  |
| 66                                                                            | Detected             | <22.29               | Not detected            | N/A                  |
| 71                                                                            | Detected             | <22.29               | Not detected            | N/A                  |
| 75                                                                            | Detected             | <22.29               | Not detected            | N/A                  |
| 76                                                                            | Detected             | <22.29               | Not detected            | N/A                  |
| <i>Not detected by artus and not detected by NeuMoDx, n = 38</i>              |                      |                      |                         |                      |
| 1                                                                             | Not detected         | N/A                  | Not detected            | N/A                  |
| 2                                                                             | Not detected         | N/A                  | Not detected            | N/A                  |
| 3                                                                             | Not detected         | N/A                  | Not detected            | N/A                  |
| 4                                                                             | Not detected         | N/A                  | Not detected            | N/A                  |

|    |              |     |              |     |
|----|--------------|-----|--------------|-----|
| 5  | Not detected | N/A | Not detected | N/A |
| 6  | Not detected | N/A | Not detected | N/A |
| 7  | Not detected | N/A | Not detected | N/A |
| 8  | Not detected | N/A | Not detected | N/A |
| 10 | Not detected | N/A | Not detected | N/A |
| 11 | Not detected | N/A | Not detected | N/A |
| 12 | Not detected | N/A | Not detected | N/A |
| 14 | Not detected | N/A | Not detected | N/A |
| 16 | Not detected | N/A | Not detected | N/A |
| 17 | Not detected | N/A | Not detected | N/A |
| 18 | Not detected | N/A | Not detected | N/A |
| 19 | Not detected | N/A | Not detected | N/A |
| 25 | Not detected | N/A | Not detected | N/A |
| 26 | Not detected | N/A | Not detected | N/A |
| 27 | Not detected | N/A | Not detected | N/A |
| 29 | Not detected | N/A | Not detected | N/A |
| 30 | Not detected | N/A | Not detected | N/A |
| 31 | Not detected | N/A | Not detected | N/A |
| 32 | Not detected | N/A | Not detected | N/A |
| 33 | Not detected | N/A | Not detected | N/A |
| 34 | Not detected | N/A | Not detected | N/A |
| 35 | Not detected | N/A | Not detected | N/A |
| 36 | Not detected | N/A | Not detected | N/A |
| 41 | Not detected | N/A | Not detected | N/A |
| 43 | Not detected | N/A | Not detected | N/A |
| 44 | Not detected | N/A | Not detected | N/A |
| 45 | Not detected | N/A | Not detected | N/A |
| 46 | Not detected | N/A | Not detected | N/A |
| 49 | Not detected | N/A | Not detected | N/A |
| 50 | Not detected | N/A | Not detected | N/A |
| 51 | Not detected | N/A | Not detected | N/A |
| 52 | Not detected | N/A | Not detected | N/A |
| 53 | Not detected | N/A | Not detected | N/A |
| 74 | Not detected | N/A | Not detected | N/A |

EBV, Epstein-Barr virus; IU, international units; LoD, limit of detection; N/A, not applicable.

## References

10. NeuMoDx CMV Quant Test Strip: Instructions for Use. Available online: [https://www.neumodx.com/wp-content/uploads/2020/09/IFU\\_201400\\_NeuMoDx%E2%84%A2-CMV-Quant-Test-Strip\\_40600165\\_D\\_US-Export.pdf](https://www.neumodx.com/wp-content/uploads/2020/09/IFU_201400_NeuMoDx%E2%84%A2-CMV-Quant-Test-Strip_40600165_D_US-Export.pdf) (accessed on 31 May 2022).
11. NeuMoDx EBV Quant Test Strip: Instructions for Use. Available online: [https://www.neumodx.com/wp-content/uploads/2021/07/IFU\\_201500\\_NeuMoDx%E2%84%A2-EBV-Quant-Test-Strip\\_40600294\\_E\\_US-Export.pdf](https://www.neumodx.com/wp-content/uploads/2021/07/IFU_201500_NeuMoDx%E2%84%A2-EBV-Quant-Test-Strip_40600294_E_US-Export.pdf) (accessed on 31 May 2022).20. Artus® CMV QS-RGQ MDx Kit Instructions for Use (Handbook). Version 1. Available online: <https://www.qiagen.com/us/products/diagnostics-and-clinical-research/transplant/artus-viral-load/artus-cmv-qs-rgq-mdx-kit-us/> (accessed on 31 May 2022).
23. Mourik, K.; Boers, S.A.; van Rijn, A.L.; Thijssen, J.C.P.; Doorn, R.; Svraka, S.; Bart, A.; Wessels, E.; Claas, E.C.J.; Nijhuis, R.H.T. Evaluation of the sample-to-result, random access NeuMoDx platform for viral load testing of Cytomegalovirus and Epstein Barr virus in clinical specimens. *J. Clin. Virol.* **2022**, *149*, 105122.
26. Artus EBV PCR Kits CE. Available online: <https://www.qiagen.com/gb/products/diagnostics-and-clinical-research/transplant/artus-viral-load/artus-ebv-pcr-kits-ce/> (accessed on 31 May 2022).
